# Supplementary material for: Systematic Variation in Reviewer Practice According to Country and Gender in the Field of Ecology and Evolution
Source: PLOS journal article supplement (doi:10.1371/journal.pone.0003202), 2008-09-11
Supplement: S3 (10.1371/journal.pone.0003202.s003) [file journal.pone.0003202.s003]

## **Notes to Dataset S1**

Dataset only includes responses to survey questions of interest to this paper. Any unanswered questions were left blank.
